# Supplementary material for: Microbial Forensics: Predicting Phenotypic Characteristics and Environmental Conditions from Large-Scale Gene Expression Profiles
Source: PLoS Comput Biol. 2015 Mar 16;11(3):e1004127. doi: 10.1371/journal.pcbi.1004127 (PMC4361189; doi:10.1371/journal.pcbi.1004127)
Supplement: S12 Table — (XLSX) [file pcbi.1004127.s016.xlsx]

## Sheet: Carbon Source
Blanks				ppiD													lcdD													WT
				Glucose				Glycerol				Lactate					Glucose				Glycerol				Lactate					Glucose				Glycerol				Lactate
Glucose	Glycerol	Lactate		Rep 1	Rep 2	Average	SEM	Rep 1	Rep 2	Average	SEM	Rep 1	Rep 2	Average	SEM		Rep 1	Rep 2	Average	SEM	Rep 1	Rep 2	Average	SEM	Rep 1	Rep 2	Average	SEM		Rep 1	Rep 2	Average	SEM	Rep 1	Rep 2	Average	SEM	Rep 1	Rep 2	Average	SEM
0.08005	0.0796	0.09025		0.082	0.085	0.00345	0.0015	0.08	0.0845	0.00265	0.00225	0.087	0.0885	-0.0025	0.000750002		0.0827	0.0836	0.0031	0.00045	0.0861	0.0808	0.00384999	0.00265	0.0915	0.0924	0.0017	0.00045		0.0826	0.0832	0.00285	0.000300001	0.0803	0.0798	0.00045	0.000250001	0.0918	0.0929	0.0021	0.000550002
0.081	0.08145	0.0911		0.09	0.0928	0.0104	0.0014	0.0917	0.0908	0.0098	0.00045	0.0963	0.0971	0.0056	0.000399999		0.0909	0.0905	0.0097	0.0002	0.0947	0.0913	0.01155	0.0017	0.0977	0.0973	0.0064	0.0002		0.0898	0.0911	0.00945	0.00065	0.0914	0.092	0.01025	0.000300001	0.0985	0.0993	0.0078	0.000399999
0.0811	0.0815	0.09285		0.0901	0.0943	0.0111	0.0021	0.0916	0.0909	0.00975	0.000350002	0.0967	0.0974	0.0042	0.000350002		0.0922	0.0895	0.00975	0.00135	0.0942	0.0913	0.01125	0.00145	0.0996	0.1007	0.0073	0.000549998		0.09	0.0915	0.00965	0.000749998	0.0907	0.0919	0.0098	0.000599999	0.0997	0.1001	0.00705	0.000200003
0.0819	0.0814	0.0941		0.091	0.095	0.0111	0.002	0.0917	0.0911	0.01	0.000300001	0.0969	0.0975	0.0031	0.000299998		0.0903	0.0914	0.00895	0.000549998	0.0944	0.0915	0.01155	0.00145	0.1007	0.101	0.00675	0.000150003		0.0914	0.0921	0.00985	0.000350002	0.0905	0.0918	0.00974999	0.00065	0.1	0.1003	0.00605	0.000149999
0.08165	0.08125	0.0932		0.0922	0.0957	0.0123	0.00175	0.0918	0.091	0.01015	0.000399999	0.0972	0.098	0.0044	0.000399999		0.0904	0.0933	0.0102	0.00145	0.0947	0.0917	0.01195	0.0015	0.1016	0.1014	0.0083	9.9998e-05		0.0915	0.0927	0.01045	0.000599999	0.0904	0.0915	0.0097	0.000549998	0.1002	0.1006	0.0072	0.0002
0.08175	0.0813	0.09415		0.0942	0.097	0.01385	0.0014	0.0921	0.0912	0.01035	0.00045	0.0975	0.0982	0.0037	0.000350002		0.091	0.0955	0.0115	0.00225	0.0952	0.0923	0.01245	0.00145	0.1028	0.1007	0.0076	0.00105		0.092	0.0939	0.0112	0.000950001	0.0907	0.0923	0.0102	0.000799999	0.1004	0.1009	0.0065	0.000250001
0.0817	0.081	0.09465		0.0951	0.0979	0.0148	0.0014	0.0922	0.0916	0.0109	0.000300001	0.0977	0.0983	0.00335	0.000300001		0.0921	0.0973	0.013	0.0026	0.0955	0.0928	0.01315	0.00135	0.1022	0.0999	0.0064	0.00115		0.0927	0.0955	0.0124	0.0014	0.0912	0.0932	0.0112	0.000999998	0.1009	0.1013	0.00645	0.0002
0.08155	0.0808	0.09365		0.0962	0.0987	0.0159	0.00125	0.0926	0.0919	0.01145	0.000350002	0.0982	0.0987	0.0048	0.000250001		0.0966	0.098	0.01575	0.000699997	0.0962	0.0933	0.01395	0.00145	0.1013	0.0996	0.0068	0.000849999		0.0941	0.0974	0.0142	0.00165	0.0913	0.0935	0.0116	0.0011	0.1015	0.102	0.0081	0.000250001
0.08175	0.08095	0.0935		0.0974	0.0989	0.0164	0.000749998	0.0931	0.0924	0.0118	0.000349998	0.0985	0.0989	0.00519999	0.0002		0.0961	0.0999	0.01625	0.0019	0.0966	0.0938	0.01425	0.0014	0.1024	0.0997	0.00754999	0.00135		0.0954	0.0999	0.0159	0.00225	0.0919	0.0942	0.0121	0.00115	0.1019	0.1025	0.00869999	0.000300001
0.08215	0.08095	0.0941		0.0992	0.1006	0.01775	0.000699997	0.0937	0.093	0.0124	0.000349998	0.0989	0.0992	0.00495	0.000150003		0.0979	0.1001	0.01685	0.0011	0.097	0.0941	0.0146	0.00145	0.1025	0.1003	0.0073	0.0011		0.0968	0.1015	0.017	0.00235	0.0928	0.0949	0.0129	0.00105	0.1028	0.1032	0.0089	0.000200003
0.0818	0.0809	0.0935		0.0997	0.1019	0.019	0.0011	0.0943	0.0935	0.013	0.000399999	0.0991	0.0997	0.0059	0.000299998		0.0993	0.101	0.01835	0.000850003	0.0973	0.0946	0.01505	0.00135	0.1021	0.1006	0.00785	0.000750002		0.0985	0.1035	0.0192	0.0025	0.0934	0.0955	0.01355	0.00105	0.1035	0.1042	0.01035	0.000349998
0.0819	0.08095	0.09255		0.102	0.103	0.0206	0.000500001	0.0948	0.0943	0.0136	0.000250001	0.0995	0.1001	0.00725	0.000300001		0.1003	0.1018	0.01915	0.000750002	0.0977	0.0949	0.01535	0.0014	0.103	0.1014	0.00965	0.000799999		0.1003	0.1059	0.0212	0.0028	0.0942	0.0966	0.01445	0.0012	0.1047	0.1055	0.01255	0.000399999
0.08175	0.081	0.0932		0.1033	0.1056	0.0227	0.00115	0.0954	0.0947	0.01405	0.000349998	0.1	0.1005	0.00705	0.000250001		0.1021	0.1042	0.0214	0.00105	0.098	0.0953	0.01565	0.00135	0.1035	0.1022	0.00965	0.00065		0.1025	0.1086	0.0238	0.00305	0.0949	0.097	0.01495	0.00105	0.1057	0.1067	0.013	0.000500001
0.08185	0.08105	0.0922		0.1049	0.1068	0.024	0.000949997	0.096	0.095	0.01445	0.000500001	0.1	0.1008	0.0082	0.000399999		0.106	0.1049	0.0236	0.000549998	0.0986	0.0959	0.0162	0.00135	0.1049	0.1027	0.0116	0.0011		0.1051	0.1128	0.0271	0.00385	0.0962	0.0978	0.01595	0.000800002	0.1068	0.1076	0.015	0.000400003
0.0817	0.0811	0.0931		0.1064	0.108	0.0255	0.000800002	0.0967	0.0956	0.01505	0.000549998	0.1005	0.1012	0.00775	0.000349998		0.1059	0.1055	0.024	0.0002	0.0993	0.0966	0.01685	0.00135	0.1063	0.1045	0.0123	0.000899997		0.1082	0.1158	0.0303	0.0038	0.0967	0.0987	0.0166	0.001	0.1077	0.1088	0.01515	0.000550002
0.08185	0.081	0.09225		0.1088	0.1103	0.0277	0.000749998	0.0974	0.0962	0.0158	0.000600003	0.1012	0.1018	0.00925	0.000300001		0.1088	0.1083	0.0267	0.000250001	0.0999	0.0973	0.0176	0.0013	0.1073	0.1059	0.01435	0.000700001		0.1119	0.1195	0.03385	0.0038	0.0977	0.0996	0.01765	0.000950001	0.1084	0.1095	0.0167	0.000549998
0.08185	0.081	0.09245		0.1117	0.113	0.0305	0.00065	0.0981	0.0968	0.01645	0.00065	0.1014	0.1021	0.0093	0.000349998		0.1107	0.1108	0.0289	5.00008e-05	0.1006	0.0979	0.01825	0.00135	0.1078	0.1075	0.0152	0.000149999		0.1163	0.1232	0.0379	0.00345	0.0986	0.1006	0.0186	0.000999998	0.1091	0.1101	0.01715	0.000500001
0.0821	0.0808	0.092		0.114	0.1143	0.03205	0.000149999	0.0986	0.0975	0.01725	0.000550002	0.1015	0.1024	0.00995	0.00045		0.1134	0.114	0.0316	0.000300001	0.1013	0.0987	0.0192	0.0013	0.1093	0.1088	0.01705	0.000250001		0.1247	0.128	0.04425	0.00165	0.0994	0.1017	0.01975	0.00115	0.1093	0.1105	0.0179	0.000599999
0.08155	0.081	0.0926		0.1166	0.1195	0.0365	0.00145	0.0993	0.0982	0.01775	0.000549998	0.1022	0.103	0.01	0.000399999		0.1165	0.1182	0.0358	0.000849999	0.102	0.0995	0.01975	0.00125	0.1103	0.1103	0.0177	0		0.1301	0.1339	0.05045	0.0019	0.1006	0.1027	0.02065	0.00105	0.1106	0.1113	0.01835	0.000349998
0.0815	0.0809	0.0923		0.1192	0.122	0.0391	0.0014	0.1004	0.0989	0.01875	0.000750002	0.1027	0.1035	0.0108	0.000399999		0.1209	0.1219	0.0399	0.000500001	0.1027	0.1002	0.02055	0.00125	0.1117	0.111	0.01905	0.000349998		0.1366	0.1412	0.0574	0.0023	0.1021	0.104	0.02215	0.000950001	0.1112	0.1125	0.01955	0.00065
0.08165	0.081	0.0929		0.1226	0.1242	0.04175	0.000800002	0.1011	0.0998	0.01945	0.00065	0.1032	0.104	0.0107	0.000399999		0.1254	0.1272	0.04465	0.0009	0.1035	0.1011	0.0213	0.0012	0.1123	0.1118	0.01915	0.000250001		0.1446	0.1498	0.06555	0.0026	0.1036	0.1054	0.0235	0.0009	0.1121	0.1136	0.01995	0.000750002
0.0818	0.0809	0.0925		0.1262	0.1297	0.04615	0.00175	0.102	0.1001	0.02015	0.000949997	0.1036	0.1043	0.01145	0.000349998		0.1312	0.1355	0.05155	0.00215	0.1043	0.102	0.02225	0.00115	0.1123	0.1127	0.02	0.0002		0.1538	0.1596	0.0749	0.0029	0.1059	0.1069	0.0255	0.000500001	0.1132	0.1147	0.02145	0.000749998
0.08185	0.081	0.0914		0.1301	0.1362	0.0513	0.00305	0.1029	0.1011	0.021	0.0009	0.1041	0.1048	0.01305	0.000350002		0.1396	0.1435	0.0597	0.00195	0.1052	0.1029	0.02305	0.00115	0.1126	0.1135	0.02165	0.00045		0.1642	0.1709	0.0857	0.00335	0.1054	0.1081	0.02575	0.00135	0.1144	0.1158	0.0237	0.000700001
0.08165	0.08095	0.09295		0.1348	0.1407	0.0561	0.00295	0.1039	0.102	0.022	0.000950001	0.1046	0.1055	0.0121	0.00045		0.1508	0.1534	0.07045	0.0013	0.1064	0.104	0.02425	0.0012	0.1135	0.1139	0.02075	0.0002		0.1761	0.1862	0.0995	0.00505	0.1068	0.1096	0.02725	0.0014	0.1153	0.1168	0.0231	0.000750002
0.0815	0.0808	0.09285		0.1401	0.1463	0.0617	0.0031	0.1049	0.1032	0.02325	0.000849999	0.105	0.1059	0.0126	0.00045		0.1637	0.1655	0.0831	0.0009	0.1074	0.1049	0.02535	0.00125	0.1131	0.1145	0.02095	0.000700001		0.1904	0.204	0.1157	0.0068	0.1096	0.1117	0.02985	0.00105	0.1167	0.1181	0.02455	0.000700001
0.08175	0.0809	0.0917		0.1457	0.1517	0.06695	0.00300001	0.1061	0.1041	0.0242	0.001	0.1059	0.1065	0.0145	0.000300001		0.1771	0.1797	0.09665	0.0013	0.1085	0.1062	0.02645	0.00115	0.1142	0.1154	0.0231	0.000599999		0.2086	0.2259	0.1355	0.00865	0.1123	0.1135	0.032	0.000599999	0.1179	0.1196	0.02705	0.000849999
0.08155	0.0808	0.09205		0.1522	0.1587	0.0739	0.00325	0.1072	0.1051	0.02535	0.00105	0.1062	0.1071	0.0146	0.00045		0.1881	0.1913	0.10815	0.0016	0.1099	0.1074	0.02785	0.00125	0.1155	0.1165	0.02395	0.000499997		0.2321	0.2506	0.1598	0.00925001	0.1135	0.1153	0.0336	0.0009	0.1197	0.1212	0.0284	0.000750002
0.08185	0.0808	0.0926		0.1593	0.1663	0.08095	0.0035	0.1087	0.1072	0.02715	0.000750002	0.1069	0.1083	0.015	0.000700001		0.1969	0.2	0.1166	0.00155	0.1113	0.1088	0.02925	0.00125	0.1165	0.1182	0.02475	0.000849999		0.2622	0.2741	0.1863	0.00595	0.1156	0.1178	0.0359	0.0011	0.1213	0.123	0.02955	0.000850003
0.0819	0.0811	0.0927		0.1669	0.1748	0.08895	0.00395	0.1098	0.1075	0.02755	0.00115	0.1074	0.1089	0.01545	0.000750002		0.2045	0.2168	0.12875	0.00615	0.1129	0.1105	0.0306	0.0012	0.1173	0.1193	0.0256	0.001		0.2917	0.2903	0.2091	0.000699997	0.1174	0.1201	0.03765	0.00135	0.1258	0.1251	0.03275	0.000349998
0.0818	0.08085	0.09125		0.1762	0.1833	0.09795	0.00355	0.1111	0.1087	0.02905	0.0012	0.108	0.1093	0.0174	0.00065		0.2187	0.2377	0.1464	0.0095	0.1147	0.1123	0.03265	0.0012	0.119	0.1206	0.02855	0.000799999		0.2969	0.2996	0.21645	0.00135	0.1197	0.1228	0.0404	0.00155	0.1278	0.1274	0.03635	0.000200003
0.08185	0.0807	0.0913		0.1867	0.193	0.108	0.00315	0.1125	0.1104	0.03075	0.00105	0.1089	0.1102	0.01825	0.00065		0.2366	0.2572	0.16505	0.0103	0.1167	0.1145	0.0349	0.0011	0.1213	0.123	0.03085	0.000850003		0.3032	0.3178	0.22865	0.00729999	0.1239	0.1268	0.04465	0.00145	0.1321	0.1299	0.0397	0.0011
0.0818	0.08105	0.09245		0.1988	0.203	0.1191	0.0021	0.114	0.1113	0.0316	0.00135	0.1098	0.111	0.01795	0.000599999		0.2655	0.2792	0.19055	0.00684999	0.1189	0.1169	0.03685	0.001	0.1224	0.1251	0.0313	0.00135		0.3325	0.3538	0.26135	0.01065	0.1255	0.1293	0.04635	0.0019	0.1326	0.1325	0.0401	5.00008e-05
0.08165	0.08115	0.09165		0.2112	0.2149	0.1314	0.00185	0.1154	0.113	0.03305	0.0012	0.1103	0.1118	0.0194	0.000750002		0.2978	0.3087	0.2216	0.00545	0.1215	0.1195	0.03935	0.001	0.1254	0.1273	0.0347	0.000949994		0.3707	0.3984	0.3029	0.01385	0.1293	0.1331	0.05005	0.0019	0.1331	0.1355	0.04265	0.0012
0.08175	0.08085	0.0915		0.2251	0.2222	0.1419	0.00144999	0.1173	0.1146	0.0351	0.00135	0.1114	0.1128	0.0206	0.000700001		0.3351	0.3418	0.2567	0.00335	0.1242	0.1225	0.0425	0.000849999	0.1282	0.1303	0.03775	0.00105		0.4117	0.4444	0.3463	0.01635	0.134	0.1372	0.05475	0.0016	0.1366	0.139	0.0463	0.0012
0.082	0.081	0.093		0.2409	0.2339	0.1554	0.0035	0.119	0.116	0.0365	0.0015	0.1124	0.1136	0.02	0.000599999		0.371	0.3793	0.29315	0.00415	0.1274	0.1265	0.04595	0.00045	0.1315	0.1328	0.03915	0.000649996		0.4563	0.4937	0.393	0.0187	0.1377	0.142	0.05885	0.00215	0.1405	0.1433	0.0489	0.0014
0.0816	0.08095	0.09265		0.2569	0.2434	0.16855	0.00675001	0.121	0.1177	0.0384	0.00165	0.1131	0.1146	0.0212	0.000750002		0.4117	0.4239	0.3362	0.0061	0.1316	0.1312	0.05045	0.000200003	0.1343	0.1367	0.04285	0.00120001		0.5032	0.5369	0.43845	0.01685	0.1424	0.1469	0.0637	0.00225	0.1445	0.1476	0.0534	0.00155
0.0817	0.08105	0.09215		0.2708	0.2512	0.1793	0.0098	0.1231	0.1198	0.0404	0.00165	0.1141	0.1154	0.0226	0.00065		0.4554	0.4665	0.37925	0.00555001	0.1362	0.1358	0.05495	0.000199996	0.1385	0.1399	0.04705	0.000699997		0.5463	0.5667	0.4748	0.0102	0.1488	0.1536	0.07015	0.0024	0.1527	0.1525	0.06045	0.000100002
0.0815	0.0807	0.09175		0.2846	0.275	0.1983	0.00479999	0.1251	0.1214	0.04255	0.00185	0.1151	0.1166	0.0241	0.000750002		0.4772	0.48	0.3971	0.00139999	0.1417	0.1407	0.0605	0.000500001	0.1421	0.1445	0.05155	0.0012		0.5662	0.5795	0.49135	0.00665	0.1535	0.1586	0.07535	0.00255	0.1587	0.1574	0.0663	0.000650004
0.08155	0.0811	0.09195		0.3016	0.2797	0.2091	0.01095	0.1275	0.1235	0.0444	0.002	0.1163	0.1176	0.025	0.00065		0.4984	0.4929	0.4141	0.00274999	0.146	0.1453	0.06455	0.000349998	0.1468	0.149	0.05595	0.0011		0.5617	0.6052	0.5019	0.02175	0.1603	0.1656	0.08185	0.00265	0.1601	0.1632	0.0697	0.00155
0.0822	0.08125	0.09285		0.3117	0.282	0.21465	0.01485	0.1296	0.1256	0.04635	0.002	0.1177	0.1188	0.0254	0.000549998		0.4865	0.482	0.40205	0.00225	0.1506	0.1502	0.06915	0.000200003	0.1518	0.1538	0.05995	0.000999995		0.534	0.5161	0.44285	0.00895	0.1671	0.1729	0.08875	0.0029	0.166	0.1697	0.075	0.00185
0.0818	0.0809	0.0922		0.3199	0.2941	0.2252	0.0129	0.1317	0.1279	0.0489	0.00189999	0.1188	0.1203	0.02735	0.000750002		0.4655	0.4548	0.37835	0.00534999	0.1557	0.1542	0.07405	0.000749998	0.1574	0.1591	0.06605	0.000849999		0.4949	0.5056	0.41845	0.00534999	0.1731	0.1804	0.09585	0.00365	0.1741	0.1768	0.08325	0.00135
0.08185	0.0808	0.09215		0.3473	0.3433	0.26345	0.00199999	0.1341	0.1292	0.05085	0.00245	0.12	0.1219	0.0288	0.000950001		0.4703	0.4725	0.38955	0.0011	0.1599	0.1577	0.078	0.0011	0.1629	0.1645	0.07155	0.000799999		0.5095	0.5207	0.43325	0.00559998	0.1806	0.1889	0.10395	0.00415	0.1823	0.1844	0.0912	0.00105
0.0818	0.08095	0.09225		0.3717	0.3903	0.2992	0.00930001	0.1367	0.1319	0.05335	0.0024	0.1215	0.1236	0.0303	0.00105		0.4861	0.4874	0.40495	0.000650004	0.165	0.1615	0.0823	0.00175	0.1691	0.171	0.0778	0.000950001		0.5249	0.5356	0.44845	0.00534999	0.188	0.1966	0.11135	0.00430001	0.1879	0.193	0.0982	0.00255
0.0819	0.08105	0.0925		0.3966	0.4245	0.32865	0.01395	0.1389	0.1356	0.0562	0.00165	0.1233	0.1252	0.03175	0.000950001		0.5012	0.5023	0.41985	0.000550002	0.1688	0.1651	0.0859	0.00185	0.1769	0.1782	0.08505	0.000650004		0.5379	0.5482	0.46115	0.00515002	0.1952	0.204	0.11855	0.0044	0.1965	0.2018	0.10665	0.00265
0.0819	0.0812	0.09225		0.4174	0.452	0.3528	0.0173	0.1417	0.1386	0.05895	0.00155	0.1246	0.1269	0.0335	0.00115		0.5149	0.5159	0.4335	0.000499994	0.1751	0.1701	0.0914	0.0025	0.1844	0.1852	0.09255	0.000399999		0.5513	0.5615	0.4745	0.00510001	0.2041	0.2128	0.12725	0.00435	0.2067	0.2115	0.11685	0.0024
0.0817	0.081	0.09195		0.4382	0.4806	0.3777	0.0212	0.1442	0.1395	0.06085	0.00235	0.1267	0.1286	0.0357	0.000950001		0.5279	0.529	0.44675	0.000550002	0.1804	0.1772	0.0978	0.0016	0.192	0.1942	0.10115	0.0011		0.5636	0.574	0.4871	0.0052	0.2131	0.2223	0.1367	0.0046	0.221	0.2201	0.1286	0.00045
0.08185	0.08115	0.09165		0.4629	0.499	0.3991	0.01805	0.1467	0.1425	0.06345	0.0021	0.1283	0.1303	0.03765	0.001		0.5401	0.5412	0.4588	0.000550002	0.1907	0.189	0.1087	0.000849999	0.1998	0.2021	0.1093	0.00115		0.5766	0.586	0.49945	0.00470001	0.2199	0.2305	0.14405	0.0053	0.226	0.2309	0.1368	0.00245
0.08185	0.0811	0.0918		0.4796	0.4664	0.39115	0.00660001	0.1488	0.1444	0.0655	0.0022	0.1304	0.1324	0.0396	0.001		0.5528	0.5534	0.47125	0.00029999	0.2036	0.2017	0.12155	0.000950001	0.2086	0.2112	0.1181	0.0013		0.5888	0.598	0.51155	0.00459999	0.2286	0.2387	0.15255	0.00505	0.2389	0.2422	0.14875	0.00165
0.0819	0.0812	0.09165		0.4996	0.4204	0.3781	0.0396	0.1514	0.147	0.068	0.0022	0.1326	0.1346	0.04195	0.001		0.564	0.5651	0.48265	0.000550002	0.2127	0.2104	0.13035	0.00115	0.2182	0.2203	0.1276	0.00105		0.6007	0.6092	0.52305	0.00424999	0.2387	0.2479	0.1621	0.0046	0.2487	0.2534	0.1594	0.00235
0.08195	0.08095	0.09355		0.5059	0.4389	0.39045	0.0335	0.1539	0.1496	0.0708	0.00215	0.135	0.1371	0.0425	0.00105		0.5755	0.5761	0.49385	0.00029999	0.2197	0.2215	0.13965	0.0009	0.2281	0.2293	0.13515	0.000600003		0.6121	0.6204	0.5343	0.00415	0.2455	0.2536	0.1686	0.00405	0.26	0.2674	0.17015	0.0037
0.08205	0.08105	0.09275		0.4421	0.4573	0.36765	0.00760001	0.1567	0.1519	0.07325	0.0024	0.1373	0.1399	0.04585	0.0013		0.5859	0.5866	0.5042	0.000349998	0.2332	0.2348	0.15295	0.000799999	0.241	0.243	0.14925	0.001		0.6226	0.6305	0.5445	0.00395	0.2549	0.2625	0.17765	0.00379999	0.2749	0.2811	0.18525	0.00310001
0.082	0.0808	0.0924		0.4458	0.476	0.3789	0.0151	0.1596	0.155	0.0765	0.0023	0.14	0.1423	0.04875	0.00115		0.5962	0.5963	0.51425	5.00083e-05	0.2481	0.2499	0.1682	0.0009	0.2504	0.253	0.1593	0.00129999		0.6325	0.6398	0.55415	0.00365001	0.2606	0.2709	0.18495	0.00515001	0.2877	0.2936	0.19825	0.00295
0.0817	0.08085	0.0922		0.4633	0.4924	0.39615	0.01455	0.1626	0.1585	0.0797	0.00205	0.143	0.1452	0.0519	0.0011		0.6063	0.6063	0.5246	0	0.2604	0.2627	0.1807	0.00115	0.263	0.2636	0.1711	0.00029999		0.6421	0.6494	0.56405	0.00365001	0.2678	0.2806	0.19335	0.0064	0.3044	0.3057	0.21285	0.000650004
0.08175	0.08085	0.0923		0.481	0.5076	0.41255	0.0133	0.1663	0.1619	0.08325	0.0022	0.1457	0.1484	0.05475	0.00135		0.6153	0.6154	0.5336	5.00083e-05	0.278	0.28	0.19815	0.001	0.2746	0.2767	0.18335	0.00105		0.651	0.6577	0.5726	0.00334999	0.276	0.2907	0.2025	0.00735	0.3165	0.318	0.22495	0.00074999
0.0818	0.081	0.0929		0.4988	0.5222	0.4287	0.0117	0.1695	0.1651	0.0863	0.0022	0.1493	0.1518	0.05765	0.00125001		0.6247	0.6242	0.54265	0.000250012	0.2967	0.2939	0.2143	0.00139999	0.286	0.2864	0.1933	0.000199988		0.6601	0.667	0.58175	0.00345001	0.2853	0.3024	0.21285	0.00855	0.3301	0.3298	0.23705	0.000149995
0.08185	0.08095	0.0899		0.5146	0.536	0.44345	0.0107	0.1736	0.1692	0.09045	0.0022	0.1525	0.1554	0.06405	0.00144999		0.6334	0.6325	0.5511	0.000450015	0.3084	0.3038	0.22515	0.00230001	0.2959	0.2958	0.20595	4.99934e-05		0.6684	0.6746	0.58965	0.00310001	0.2962	0.3158	0.22505	0.0098	0.3424	0.3421	0.25235	0.00015001
0.08195	0.0812	0.09235		0.5289	0.5488	0.4569	0.00994998	0.1792	0.1734	0.0951	0.0029	0.1559	0.1591	0.06515	0.0016		0.6421	0.6406	0.5594	0.000749975	0.3174	0.3128	0.2339	0.00230001	0.3055	0.3071	0.21395	0.000799999		0.6761	0.6822	0.5972	0.00305	0.308	0.3302	0.2379	0.0111	0.3556	0.3595	0.2652	0.00195
0.0819	0.08105	0.09275		0.5446	0.5608	0.4708	0.0081	0.1842	0.1782	0.10015	0.003	0.1598	0.1629	0.0686	0.00155		0.6494	0.6484	0.567	0.000499994	0.3339	0.329	0.2504	0.00245	0.3131	0.315	0.2213	0.000949994		0.684	0.6897	0.60495	0.00285	0.3209	0.3458	0.2523	0.01245	0.3731	0.3761	0.28185	0.0015
0.082	0.08105	0.09185		0.5552	0.5718	0.4815	0.00830001	0.191	0.1822	0.10555	0.0044	0.1645	0.1677	0.07425	0.0016		0.657	0.6551	0.57405	0.000950009	0.3421	0.336	0.258	0.00305	0.3203	0.3239	0.23025	0.0018		0.691	0.6964	0.6117	0.0027	0.3322	0.36	0.26505	0.0139	0.3899	0.3919	0.29905	0.001
0.08175	0.08115	0.092		0.5674	0.5816	0.49275	0.00710002	0.1968	0.1874	0.11095	0.0047	0.1683	0.1721	0.0782	0.00189999		0.6632	0.661	0.58035	0.0011	0.3556	0.3496	0.27145	0.00300001	0.3305	0.3347	0.2406	0.00209999		0.6974	0.7028	0.61835	0.0027	0.3462	0.3762	0.28005	0.015	0.4056	0.4072	0.3144	0.000799999
0.0819	0.0811	0.09375		0.579	0.5904	0.5028	0.00569999	0.206	0.1929	0.11835	0.00655	0.1729	0.177	0.0812	0.00205		0.6692	0.667	0.5862	0.0011	0.3703	0.3686	0.28835	0.000849992	0.3436	0.3467	0.2514	0.00155		0.7034	0.7083	0.62395	0.00244999	0.365	0.4003	0.30155	0.01765	0.4221	0.4222	0.3284	4.99934e-05
0.0818	0.0812	0.09325		0.5891	0.598	0.51175	0.00444999	0.2141	0.1986	0.12515	0.00775	0.1776	0.1821	0.0866	0.00225		0.6746	0.6724	0.5917	0.0011	0.3866	0.3847	0.30445	0.000949994	0.355	0.358	0.26325	0.00150001		0.7086	0.7137	0.62935	0.00255001	0.3765	0.4125	0.3133	0.018	0.4407	0.4371	0.34565	0.0018
0.08185	0.0809	0.09305		0.5982	0.6049	0.5197	0.00334999	0.2269	0.2048	0.13495	0.01105	0.1829	0.1878	0.0923	0.00245		0.6794	0.677	0.59635	0.00120002	0.4059	0.4021	0.3231	0.0019	0.3637	0.3687	0.27315	0.0025		0.7138	0.7184	0.63425	0.00229999	0.3952	0.4367	0.33505	0.02075	0.4578	0.4499	0.3608	0.00395
0.08205	0.08105	0.0934		0.6058	0.6108	0.52625	0.00250003	0.2407	0.2115	0.14505	0.0146	0.1885	0.1937	0.0977	0.0026		0.6846	0.6815	0.601	0.00154999	0.4183	0.4134	0.3348	0.00245	0.3744	0.3785	0.28305	0.00205001		0.7187	0.7235	0.63905	0.00240001	0.4087	0.456	0.3513	0.02365	0.4634	0.4645	0.37055	0.000550002
0.0816	0.08115	0.0933		0.6123	0.6153	0.5322	0.00150001	0.2632	0.2183	0.1596	0.02245	0.1941	0.2006	0.10405	0.00325		0.6896	0.6864	0.6064	0.0016	0.4384	0.4319	0.354	0.00325	0.3864	0.39	0.2949	0.00179999		0.7233	0.7273	0.6437	0.002	0.4276	0.4791	0.3722	0.02575	0.483	0.4752	0.3858	0.00390001
0.08195	0.08125	0.09345		0.6187	0.6205	0.53765	0.0009	0.2834	0.2242	0.17255	0.0296	0.2003	0.2075	0.11045	0.0036		0.694	0.6908	0.61045	0.0016	0.4543	0.4474	0.3696	0.00344999	0.396	0.4001	0.3046	0.00205		0.7282	0.7326	0.64845	0.00219998	0.4426	0.4957	0.3879	0.02655	0.492	0.4883	0.3967	0.00185001
0.0819	0.08115	0.09295		0.6232	0.6233	0.54135	5.00083e-05	0.2776	0.2309	0.1731	0.02335	0.2063	0.2142	0.1173	0.00395		0.6979	0.6944	0.61425	0.00174999	0.4787	0.469	0.3927	0.00485	0.4049	0.409	0.314	0.00205		0.7323	0.7359	0.6522	0.0018	0.4642	0.5234	0.41265	0.0296	0.5015	0.4992	0.4074	0.00115001
0.08185	0.0815	0.0909		0.6267	0.6259	0.54445	0.000400007	0.2702	0.2374	0.1723	0.0164	0.2134	0.222	0.1268	0.0043		0.7011	0.6977	0.61755	0.00169998	0.4938	0.4791	0.40495	0.00735001	0.4127	0.4182	0.32455	0.00274999		0.7356	0.7394	0.65565	0.00190002	0.4829	0.542	0.43095	0.02955	0.511	0.5099	0.41955	0.000550002

## Sheet: Oxygen
		ppiD							lcdD									WT
Aerobic			Anaerobic						Aerobic			Anaerobic						Aerobic			Anaerobic
Replica 1	Replica2	Average	SEM	Replica 1	Replica2	Average	SEM		Replica 1	Replica2	Average	SEM	Replica 1	Replica2	Average	SEM		Replica 1	Replica2	Average	SEM	Replica 1	Replica2	Average	SEM		Time (h)
0	0	0	0	0	0	0	0		0	0	0	0	0	0	0	0		0	0	0	0	0	0	0	0		0
0.038	0.029	0.0335	0.0045	0.033	0.032	0.0325	0.0005		0.031	0.024	0.0275	0.0035	0.023	0.036	0.0295	0.0065		0.037	0.037	0.037	0	0.042	0.032	0.037	0.005		2
0.415	0.677	0.546	0.131	0.138	0.15	0.144	0.006		0.339	0.366	0.3525	0.0135	0.081	0.081	0.186	0		0.45	0.518	0.45	0.034	0.163	0.148	0.1555	0.0075		8
1.011	0.969	0.99	0.021	0.974	0.976	0.975	0.001		0.893	0.909	0.901	0.008	0.908	0.941	0.9245	0.0165		1.026	0.958	1.026	0.034	1.04	0.978	1.009	0.031		24
